# Supplementary material for: An Arctic watershed observatory at Lake Peters,Alaska: weather-glacier-river-lake system data for2015–2018
Source: Copernicus journal article supplement (doi:10.5194/essd-2019-60), 2019-07-15
Supplement: Supplementary file [file essd-2019-60-AC2-supplement.pdf]

We thank anonymous Referee 2 for offering constructive feedback on our manuscript. Below we have indicated the actions we plan to take to address each of the items noted by this reviewer. Referee text is italicized and author responses are bolded.

*The data manuscript titled "An Arctic Watershed observatory at Lake Peters, AK: weather-glacier-river-lake system data for 2015-2018" provides an interesting dataset for the four year monitoring period. Three meteorological stations provide information at three different elevations, temperature sensors observe lake temperature profiles, lake water level and sediment inputs were also documented. Additionally, stage data were collected for the two main creeks. The manuscript is well-written and easy to follow. It was mostly clear to me what was done for sensor installation and how the data were processed, with some minor gaps further detailed below. My primary concern with the data is the hydrological data. It is my understanding that the location that stage data were collected changed from year to year and all data were attempted to be corrected to an initial rating curve developed in 2015. This can not be done. The authors state the assumption of a consistent stage-discharge relation, but this assumption can only be made if stage is taken at the exact same location AND the cross section of the channel does not change at that location from year to year (as well as immediately up and down stream). Based on the data presented, these assumptions can not be made and thus the only discharge data available and reliable are for 2015.*

**We appreciate this reviewer's concerns with the hydrological data for 2016, 2017, and 2018. For 2015, we applied standard stage-discharge rating curve methods, with extensive hydrologic field data spanning nearly the full open-water period and discharge range, allowing robust calculation of discharge uncertainty. We acknowledge the complications experienced in subsequent years make the hydrologic data less reliable than what is typical for published discharged records. Most substantial was the temporary gauge relocation in 2016 for Chamberlin Creek, but also potential shifting rating curve relations and some instrumentation failures.**

**Despite the acknowledged limitations in the hydrologic data for 2016 onward, we believe that our discharge record is of value as being indicative or approximate of hydrologic conditions in this region where little such hydrologic data exist. Significant effort was made to collect reasonably comparable data among years and we observe relatively strong relations among our discharge measures for all years with stage, cross-sectional geometry, and photographed water levels (Fig. 7 e-j; 2017 CAR stage-Q  $R^2=.996$   $n=4$ ; 2017 CHB stage-Q  $R^2=.881$   $n=13$ ).**

**To avoid misrepresenting data quality and identify methodological changes past 2015, we propose to report and illustrate these data to be approximate in the text, plots, and datasets. For the metadata in the Arctic Data Center, we will code all discharge observations to flag where gauging locations were relocated, where new rating curves were developed and used, where rating curve relations were extrapolated from a preceding year, and where photograph-based interpolations were used, and these will be added to the existing metadata for these datasets.**

*When downloading these hydrological data I was also surprised to only find the discharge data, it would be helpful for data users to have access to stage data and specific location information. It is my recommendation that only stage data are made available for all years other than 2015, and for 2015 both stage and discharge data with an explicit statement in the metadata about the moving of pressure transducer and differing cross sections.*

**We will add stage data for all years to the datasets at the Arctic Data Center, as recommended. See comments above on the inclusion of discharge data for 2016-2018 as approximate data.**

*Additionally, the application of the dataset is certainly interesting. However, I would like to see a bit more details and analysis of all these data. Perhaps an example of a simple model, as mentioned, and comparison to the flood event. Or perhaps a detailed analysis and inventory of the dataset.*

**We agree that these datasets have great potential for a variety of modeling applications in Earth system science. However, because this is a data description paper, we have refrained from including any analyses, as these would be beyond the scope of this manuscript. We included section 4 as an example of the utility of the data, but intentionally refrained from interpreting this example, an approach we believe is appropriate for a data description paper. We will include an additional subsection in section 4 that suggests limitations and potential uses of these data for modeling applications. For an inventory of the data, please refer to Figure 1 and Table 1.**

*I am recommending major changes based on my concerns with the hydrological data and desire to see more analysis. Minor comments are listed below and referred to by approximate line number. 33: I suggest removing webpage link and citation from the abstract.*

**The webpage link and citation are included in the abstract per the guidelines of this journal and a direct request from the editors to do so.**

*55: What implications do the "non-permanent" installations have on the dataset.*

**We agree that the implications of this descriptor might be unclear. A few words clarifying the meaning of "non-permanent" installations will be added.**

*Fig. 4: The gray dots and text is quite difficult to see and read, I suggest a different color.*

**We agree that this color scheme could be improved for clarity. The color scheme will be changed from black and grey to black, red, and blue.**

*186: How often were these measurements taken? How many points in total did you use for the rating curve?*

**We agree that the frequency and number of datapoints used to create the rating curve should be explicitly stated. Clarifying text will be added.**

*202: This assumption is really based on stage being measured at the same location and channel X-section not changing which doesn't appear to be true here.*

**See comments above on further justification added to address these concerns regarding the hydrological data, particularly the coding/flagging of gauge relocations.**

*Fig. 7: the panel identifiers a-j are difficult to see, maybe make them bigger and in a top corner?*

**We agree that the panel identifiers should be altered, and will do so as described by the reviewer.**
